# Supplementary material for: J-aggregation induced emission enhancement of BODIPY dyes via H-bonding directed supramolecular polymerization: the importance of substituents at boron
Source: Royal Society of Chemistry journal article supplement (doi:10.1039/d1qo00520k), 2021-01-01
Supplement: d1qo00520k1.pdf [file d1qo00520k1.pdf]

## Supporting Information for

### **J-Aggregation induced emission enhancement of BODIPY dyes via H-bonding directed supramolecular polymerization: The importance of substituents at boron**

Yongjie Zhang,<sup>†a</sup> Siyuan Yuan,<sup>†a</sup> Ping Liu,<sup>a</sup> Lei Jing,<sup>a</sup> Hongfei Pan,<sup>a</sup> Xiang-Kui Ren<sup>\*a,b</sup> and Zhijian Chen<sup>\*a,b</sup>

<sup>a</sup> School of Chemical Engineering and Technology, Tianjin University, Tianjin, 300072 (China)  
E-mail: zjchen@tju.edu.cn; renxiangkui@tju.edu.cn.

<sup>b</sup> Collaborative Innovation Center of Chemical Science and Chemical Engineering (Tianjin), Tianjin University, Tianjin, 300072 (China).

<sup>†</sup> These authors contributed equally to this work.

DOI: 10.1002/anie.2017XXXXX

## Table of Contents

|                                                                                    |    |
|------------------------------------------------------------------------------------|----|
| 1. General Methods .....                                                           | 2  |
| 2. Synthesis and characterization .....                                            | 3  |
| 3. UV/Vis absorption spectroscopic studies .....                                   | 13 |
| 5. Temperature-dependent and time-resolved fluorescence spectroscopic studies..... | 15 |
| 6. Studies based on cooperative supramolecular polymerization model.....           | 19 |
| 7. Concentration-dependent <sup>1</sup> H NMR spectroscopic studies .....          | 21 |
| 8. Studies based on molecular exciton theory .....                                 | 23 |
| 9. References .....                                                                | 24 |

## 1. General Methods

**Chemicals and reagents:** Solvents and reagents in synthesis process were purchased from commercial suppliers and used without further purification, unless otherwise noted. Products were purified by column chromatography with silica gel (300-400 mesh).

**NMR spectroscopy:**  $^1\text{H}$  and  $^{13}\text{C}$  NMR spectra of the compounds were recorded on Bruker AVANCE III HD (400 MHz) spectrometer using tetramethylsilane (TMS) as internal standard. Multiplicities for proton signals are abbreviated as *s*, *d*, *t*, and *m* for singlet, doublet, triplet, and multiplet, respectively.

**Mass spectrometry:** Mass spectra were measured on a Bruker Daltonics micrOTOF-QII LC-MS system.

**UV/Vis absorption spectroscopy:** UV/Vis absorption spectra were recorded on an Agilent Technologies Cary 300 UV/Vis spectrophotometer equipped with a SPV 1 × 1 temperature controller. The solvents for spectroscopic studies were spectroscopic grade and used as received. The spectra were recorded in quartz glass cuvettes and the molar extinction coefficients  $\epsilon$  was calculated according to Lambert-Beer's law:  $A = \epsilon bc$ .

**Fluorescence spectroscopy:** Steady-state and time-resolved fluorescence spectroscopic studies were carried out on an Edinburgh FLS980 spectrofluorometer. All the fluorescence spectra were corrected. The fluorescence quantum yields were determined by FLUOROMAX-4 fluorescence spectrometer with an integrating sphere (from Fluorolog, Horiba JobinYvon).

**Atomic force microscopy:** AFM measurements were performed under ambient conditions using a Bruker Dimension icon system operating in tapping mode. Silicon cantilevers with a resonance frequency of  $\sim 300$  kHz were used. Solution of dyes **1a**, **b** in MCH was drop-casted on mica surface and the solvent was evaporated in air.

## 2. Synthesis and characterization

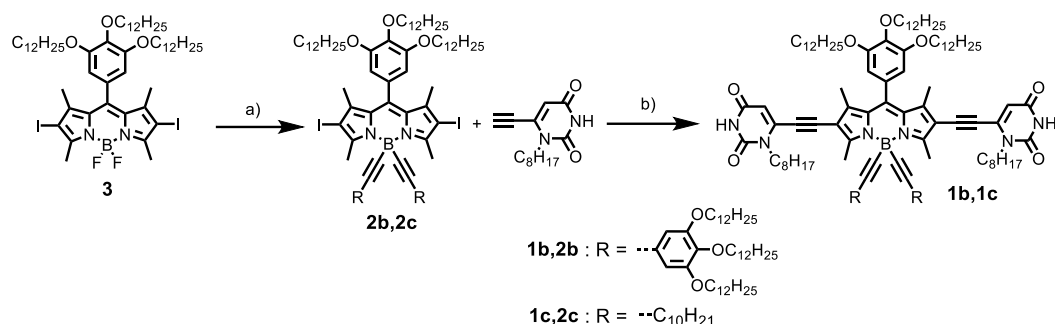

**Scheme 1** Reagents and Conditions: a) 3,4,5-tridodecyloxyphenylacetylene (1-dodecyne),  $C_2H_5BrMg$ , THF, 60 °C, 6h; b) 6-ethynyl-1-*n*-octyluracil,  $Pd(PPh_3)_4$ ,  $CuI$ , TEA, 70°C, 4h.

### General procedure for the synthesis of **2b, c**

The compound **3**<sup>1</sup> and 6-ethynyl-1-*n*-octyluracil<sup>2</sup> were prepared following our previous reports.  $C_2H_5BrMg$  (1 M, THF solution, 1.5 ml) and 3, 4, 5-tri(dodecyloxy)phenylacetylene / 1-dodecyne (1.52 mmol) were subsequently added dropwise to anhydrous THF (5 ml), and the resulting solution was stirred under  $N_2$  at 55 °C to prepare the Grignard reagent. After 2 h, compound **3** (214 mg, 0.19 mmol) was dissolved in anhydrous THF (5 ml) and stirred under  $N_2$  at 60°C, to which the Grignard reagent was added with syringe. The reaction system was stirred under  $N_2$  for another 0.5 h, and monitored by TLC analysis. After completion of the reaction, the resulting mixture was cooled to the room temperature. The solvent was removed in vacuum after which the residue was re-dissolved in  $CH_2Cl_2$  (100 mL) and washed with water (100 mL  $\times$  3) and then dried over  $Na_2SO_4$ . The solvent was evaporated in vacuum and purification of the crude product by column chromatography with  $CH_2Cl_2$ / petroleum ether (1:2, v/v) and evaporation of the solvent gave the target compound as an orange powder.

**Compound 2b** Yield: 75%. <sup>1</sup>H NMR(400MHz, Chloroform-*d*)  $\delta$  6.60 (s, 4H), 6.48 (s, 2H), 4.04 (t,  $J$  = 6.4 Hz, 2H), 3.98 – 3.88 (m, 16H), 2.96 (s, 6H), 1.83 – 1.75 (m, 14H), 1.74 – 1.67 (m, 6H), 1.58 (s, 6H), 1.46 (t,  $J$  = 10.8 Hz, 20H), 1.27 (d,  $J$  = 9.7 Hz, 140H), 0.91 – 0.85 (m, 27H). <sup>13</sup>C NMR (100 MHz,  $CDCl_3$ , ppm):  $\delta$  = 156.22, 154.34, 152.86, 143.40, 141.38, 138.90, 138.62, 129.88, 129.55, 119.39, 110.39, 106.35, 95.87, 85.92, 77.16, 73.79, 73.50, 69.48, 69.22, 31.96, 30.33, 29.78, 29.74, 29.72, 29.68, 29.63, 29.45, 29.39, 29.34, 26.14, 26.04, 22.72, 17.75, 17.14, 14.13.

**Compound 2c** Yield: 89%. <sup>1</sup>H NMR (400 MHz, Chloroform-*d*):  $\delta$  = 6.45 (s, 2H), 4.02 (t,  $J$  = 8 Hz, 2H), 3.89 (t,  $J$  = 4 Hz, 4H), 2.84 (s, 6H), 2.20-2.16 (m, 6H), 2.15-2.13 (m, 2H), 1.94-1.93 (t,  $J$  = 4 Hz, 6H), 1.79-1.74 (m, 6H), 1.54-1.49 (m, 12H), 1.43-1.35 (m, 6H), 1.28-1.26 (m, 66H), 0.88 (t,  $J$  = 8 Hz, 15H). <sup>13</sup>C NMR (100 MHz,  $CDCl_3$ , ppm):  $\delta$  = 155.89, 154.22, 142.83, 141.06, 138.76, 130.10, 129.34, 106.44, 96.08, 85.74, 84.70, 73.72, 69.42, 68.04, 31.96, 31.93, 29.78, 29.72, 29.68, 29.64, 29.60, 29.40, 29.34, 29.26, 29.14, 26.16, 26.04, 22.73, 19.85, 18.42, 17.52, 17.05, 14.12.

### General procedure for the synthesis of **1b, c**

A mixture of compound **2b, c** (0.133 mmol),  $Pd(PPh_3)_4$  (23 mg, 0.02 mmol),  $CuI$  (3.8 mg, 0.02 mmol), 6-ethynyl-1-octyluracil (82.5 mg, 2.5 mmol) and trimethylamine (10 mL) was stirred under  $N_2$  at 70 °C for 4 h and the reaction progress was monitored by TLC analysis. After completion, the reaction was cooled to room temperature and water was added (10 ml). The resulting mixture was extracted with  $CH_2Cl_2$  (20 ml  $\times$  3) and the organic layer was dried over  $Na_2SO_4$ . The volatiles were removed in vacuum, and the residue was purified by column chromatography with  $CH_2Cl_2$  / Methanol (40 : 1, v / v). Evaporation of the solvent gave the target compounds as red powder.

**BODIPY dye 1b.** Yield: 37.6%. m.p. 227–230 °C. <sup>1</sup>H NMR (400 MHz,  $CDCl_3$ )  $\delta$  8.14 (s, 2H), 6.60 (s, 4H), 6.50 (s, 2H), 5.92 (s, 2H), 4.08 – 3.97 (m, 6H), 3.93 (t,  $J$  = 6.2 Hz, 16H), 2.99 (s, 6H), 1.79 (d,  $J$  = 6.6 Hz, 6H), 1.70 (s, 14H), 1.57 (s,

16H), 1.45 (s, 20H), 1.26 (s, 154H), 0.91 – 0.82 (m, 33H). <sup>13</sup>C NMR (101 MHz, CDCl<sub>3</sub>) δ 162.08, 159.40, 154.65, 152.99, 150.51, 145.08, 139.05, 138.85, 130.25, 118.83, 113.92, 110.46, 106.05, 94.49, 88.02, 73.56, 69.72, 69.32, 46.70, 31.94, 31.92, 31.66, 30.33, 29.75, 29.70, 29.65, 29.61, 29.48, 29.45, 29.43, 29.38, 29.36, 29.19, 29.05, 28.89, 26.57, 26.16, 26.13, 26.06, 22.68, 22.54, 15.50, 14.10, 14.03, 13.74. HRMS (MALDI-TOF): calculated for C<sub>171</sub>H<sub>281</sub>BF<sub>2</sub>N<sub>6</sub>O<sub>13</sub> [M+H]<sup>+</sup> 2640.9 m/z, found 2640.2 m/z. Elemental analysis: calculated for C<sub>171</sub>H<sub>281</sub>BF<sub>2</sub>N<sub>6</sub>O<sub>13</sub>: C 77.80%, H 10.73%, N 3.18%; found: C 77.69%, H 10.59%, N 3.09%.

**BODIPY dye 1c.** Yield: 58%. m.p. 222–225 °C. <sup>1</sup>H NMR (400 MHz, CDCl<sub>3</sub>) δ 8.31 (s, 2H), 6.46 (s, 2H), 5.91 (d, *J* = 2.2 Hz, 2H), 4.01 (dd, *J* = 13.7, 6.9 Hz, 6H), 3.90 (t, *J* = 6.5 Hz, 4H), 2.89 (s, 6H), 2.17 (t, *J* = 7.3 Hz, 4H), 1.79 (q, *J* = 7.9 Hz, 6H), 1.73 (s, 4H), 1.66 (s, 6H), 1.60 (s, 4H), 1.54 – 1.48 (m, 6H), 1.44 (d, *J* = 7.8 Hz, 6H), 1.25 (s, 90H), 0.89 – 0.85 (m, 21H). <sup>13</sup>C NMR (101 MHz, CDCl<sub>3</sub>) δ 162.03, 159.12, 154.54, 150.49, 144.76, 139.31, 138.97, 130.11, 113.67, 106.01, 105.87, 97.20, 94.89, 87.88, 73.88, 69.67, 46.73, 31.94, 31.91, 31.72, 30.34, 29.76, 29.69, 29.64, 29.61, 29.42, 29.39, 29.35, 29.26, 29.22, 29.18, 29.13, 28.92, 26.65, 26.16, 26.05, 22.68, 22.58, 19.78, 15.27, 14.09, 14.05, 13.67. HRMS (ESI): calculated for C<sub>107</sub>H<sub>169</sub>BF<sub>2</sub>N<sub>6</sub>O<sub>7</sub> [M + H]<sup>+</sup> 1663.3 m/z, found 1663.7 m/z. Elemental analysis: calculated for C<sub>107</sub>H<sub>169</sub>BF<sub>2</sub>N<sub>6</sub>O<sub>7</sub>: C 77.31%, H 10.25%, N 5.06%; found: C 77.13%, H 10.15%, N 4.99%.

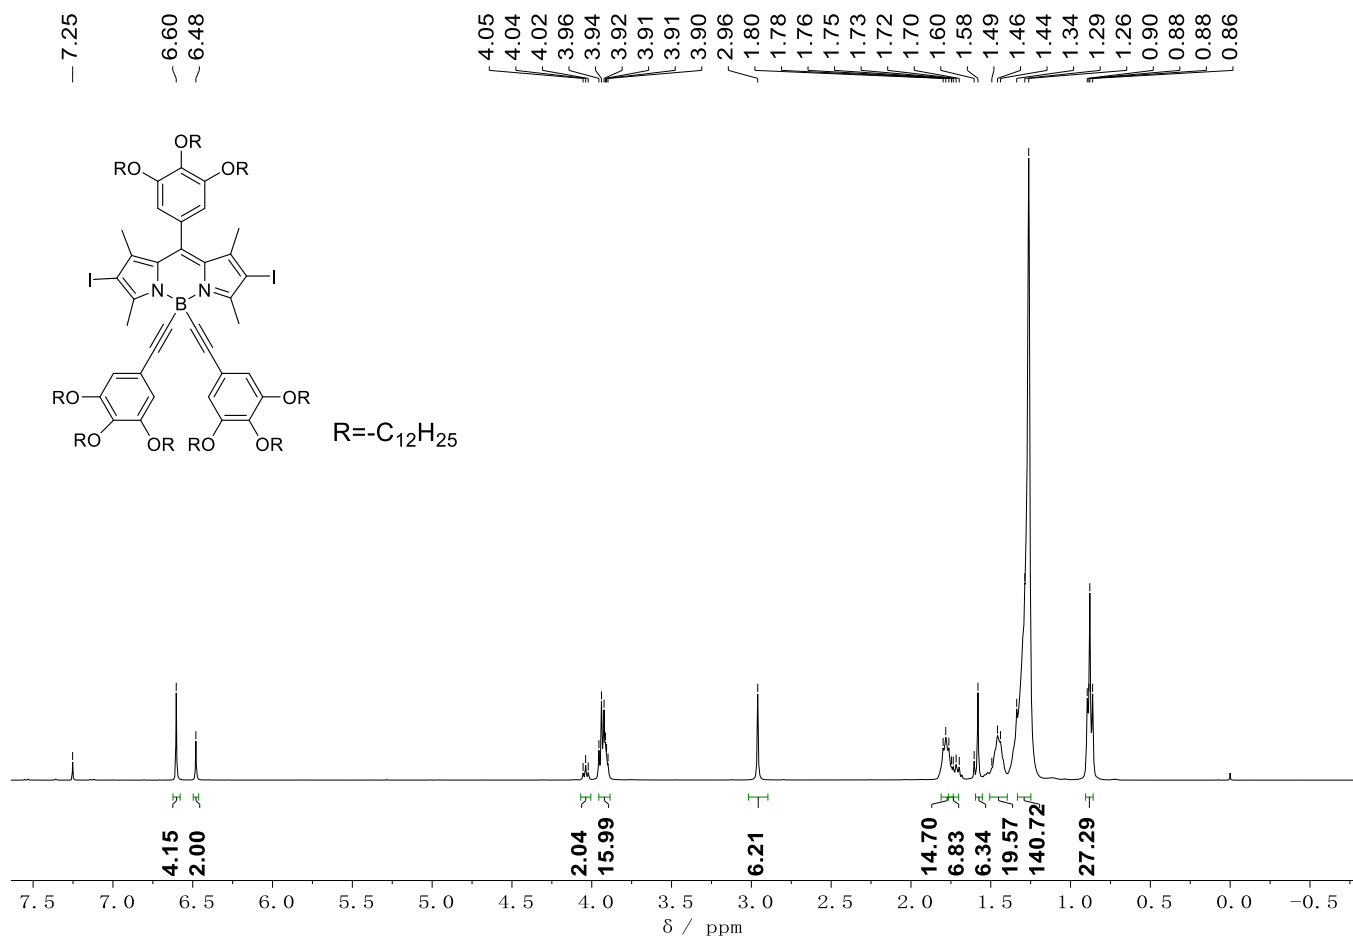

Fig. S1 The  $^1H$  NMR spectrum (400 MHz) with chemical molecular structure of compound **2b** in  $CDCl_3$  at 293 K.

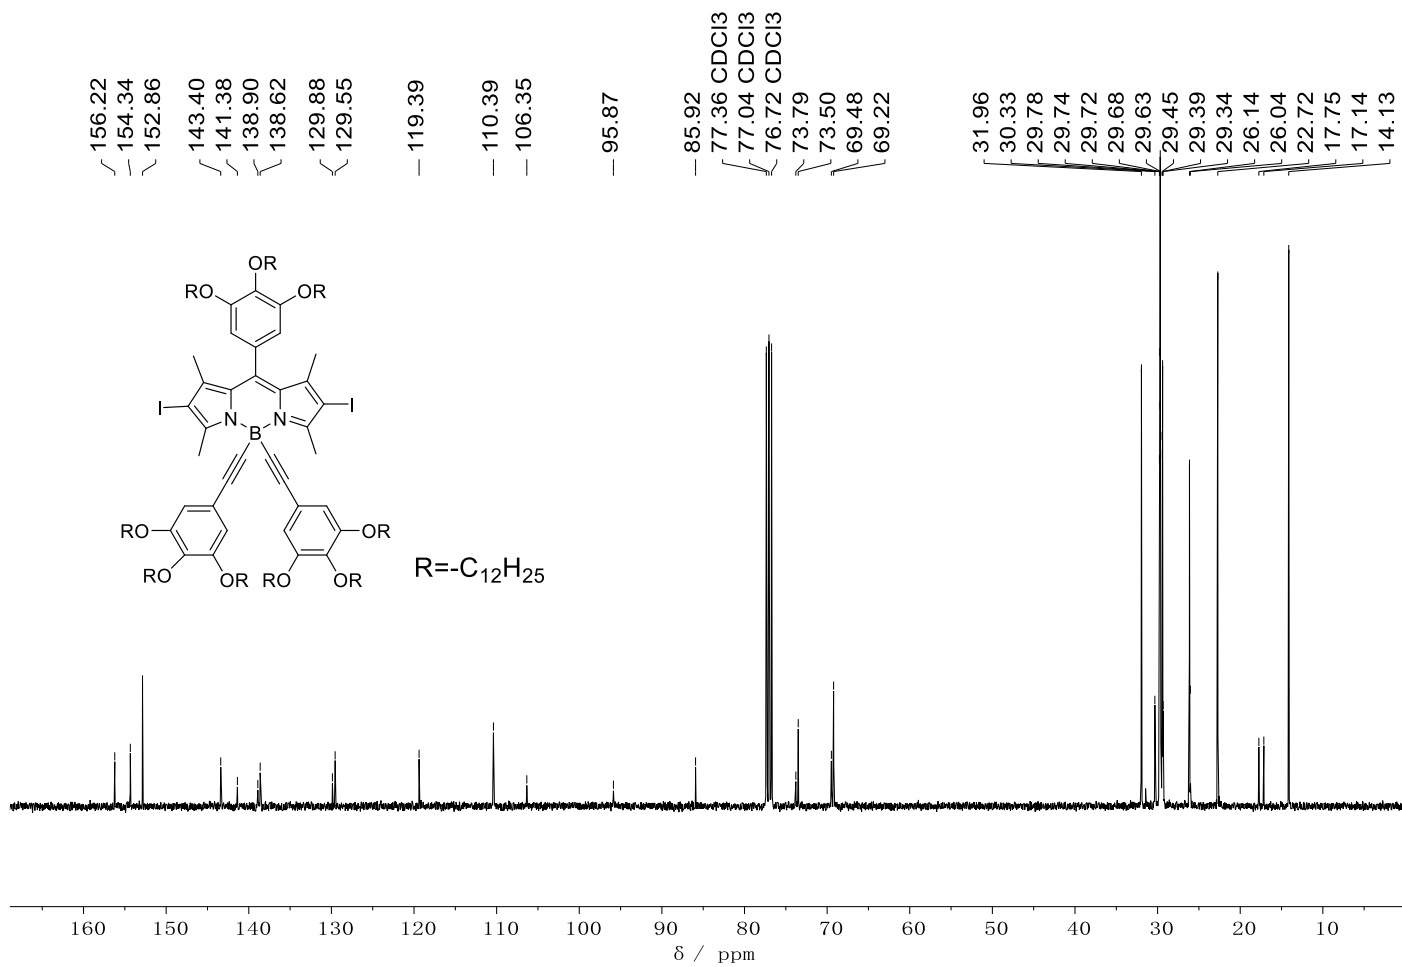

Fig. S2 The <sup>13</sup>C NMR spectrum (101 MHz) with chemical molecular structure of compound **2b** in CDCl<sub>3</sub> at 293 K.

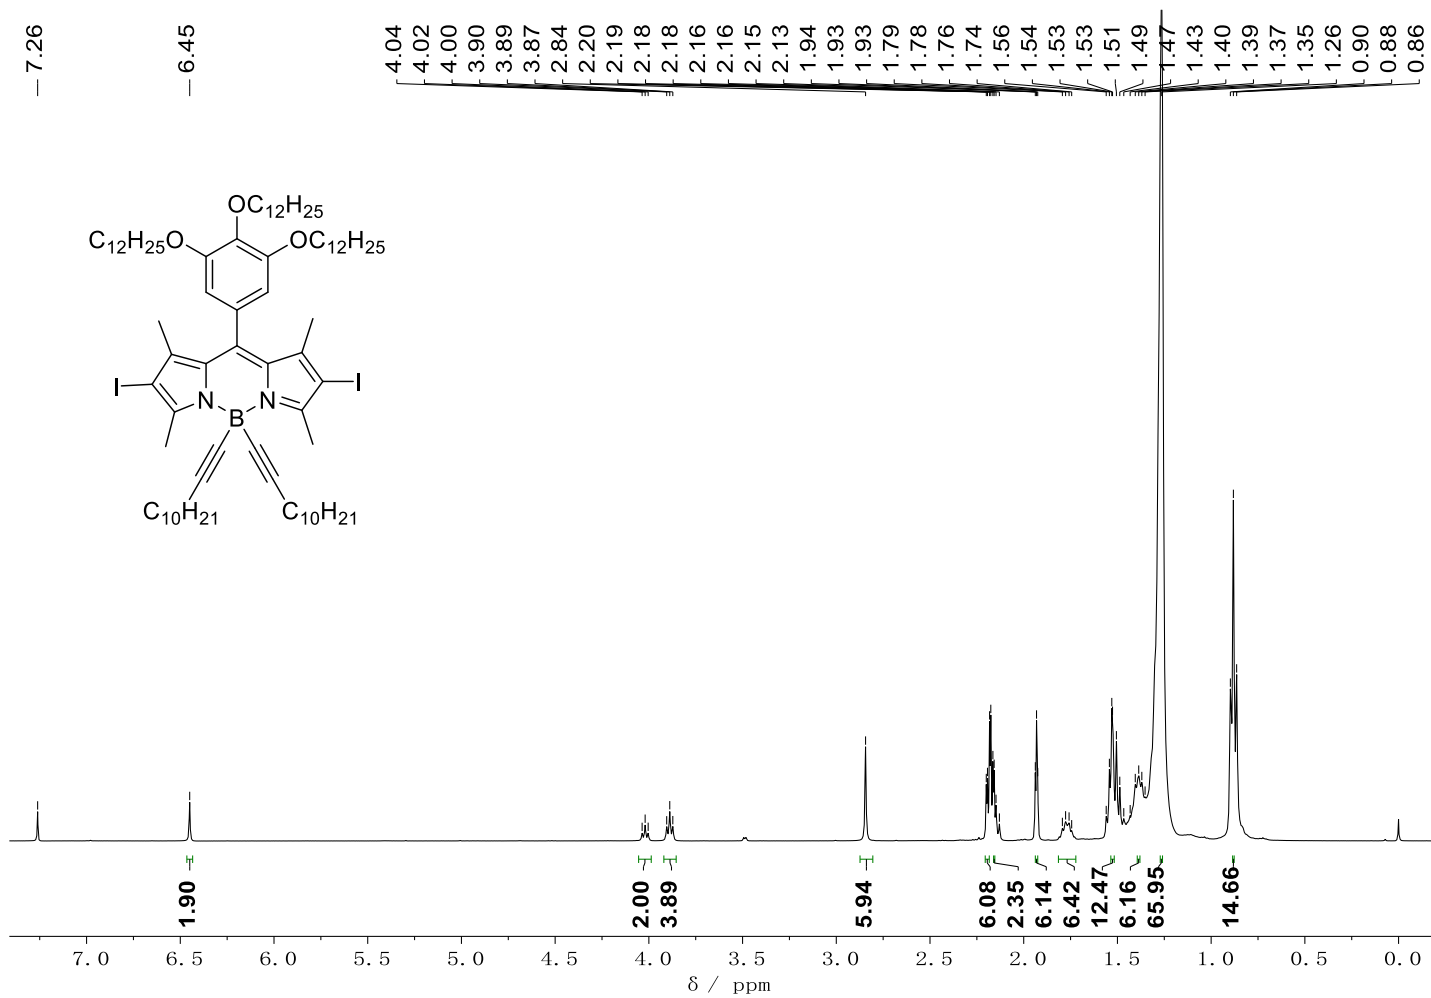

Fig. S3 The  $^1H$  NMR spectrum (400 MHz) with chemical molecular structure of compound **2c** in  $CDCl_3$  at 293 K.

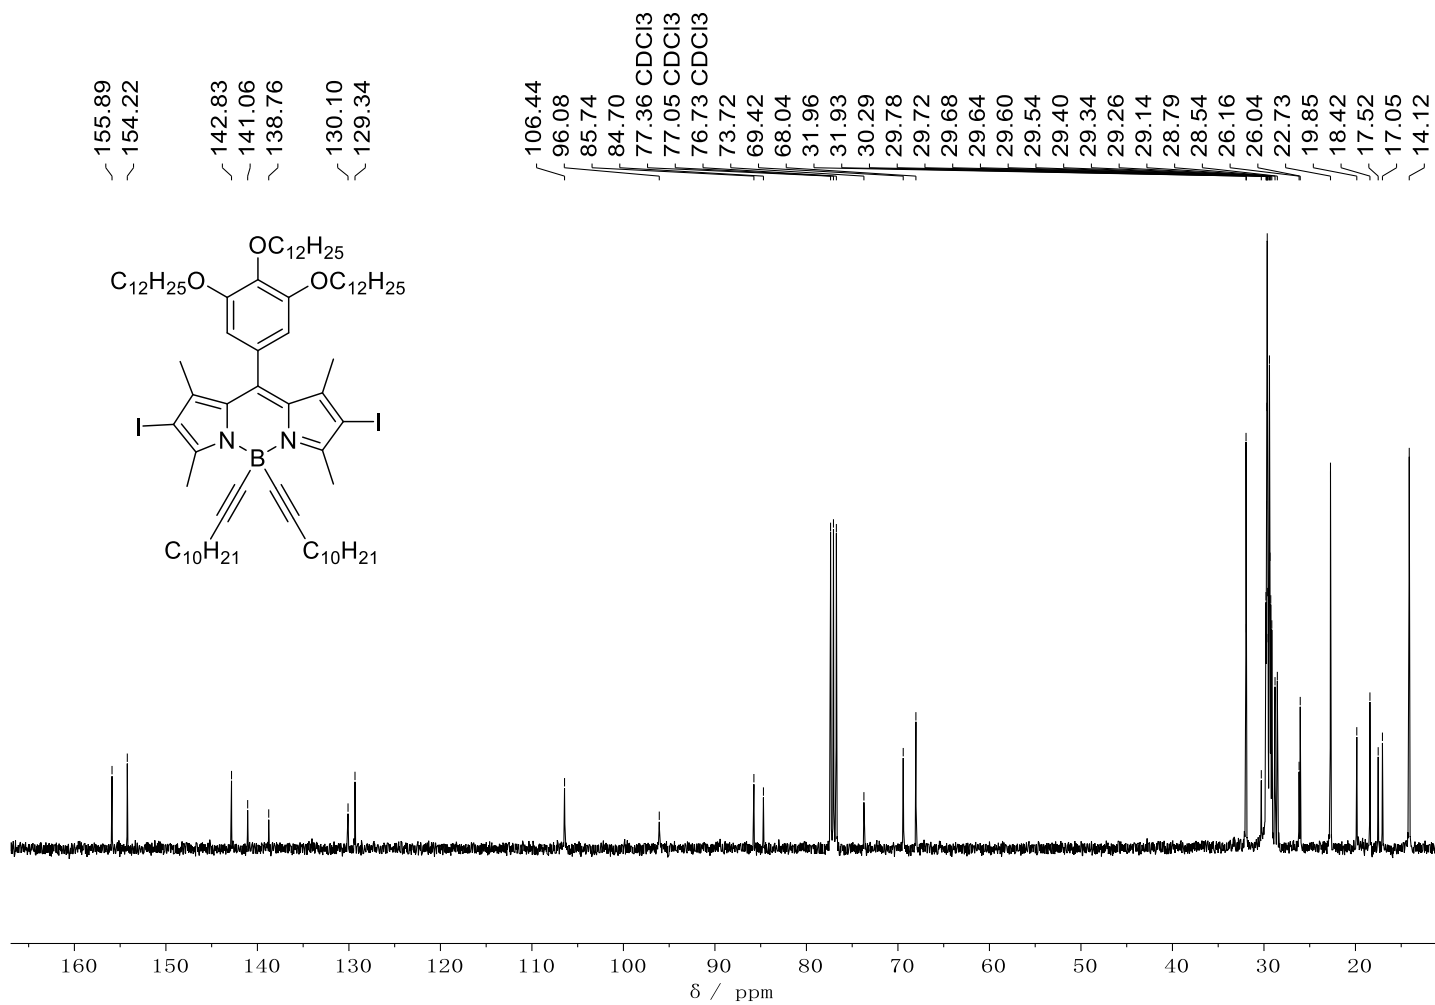

Fig. S4 The  $^{13}C$  NMR spectrum (101 MHz) with chemical molecular structure of compound **2c** in  $CDCl_3$  at 293 K



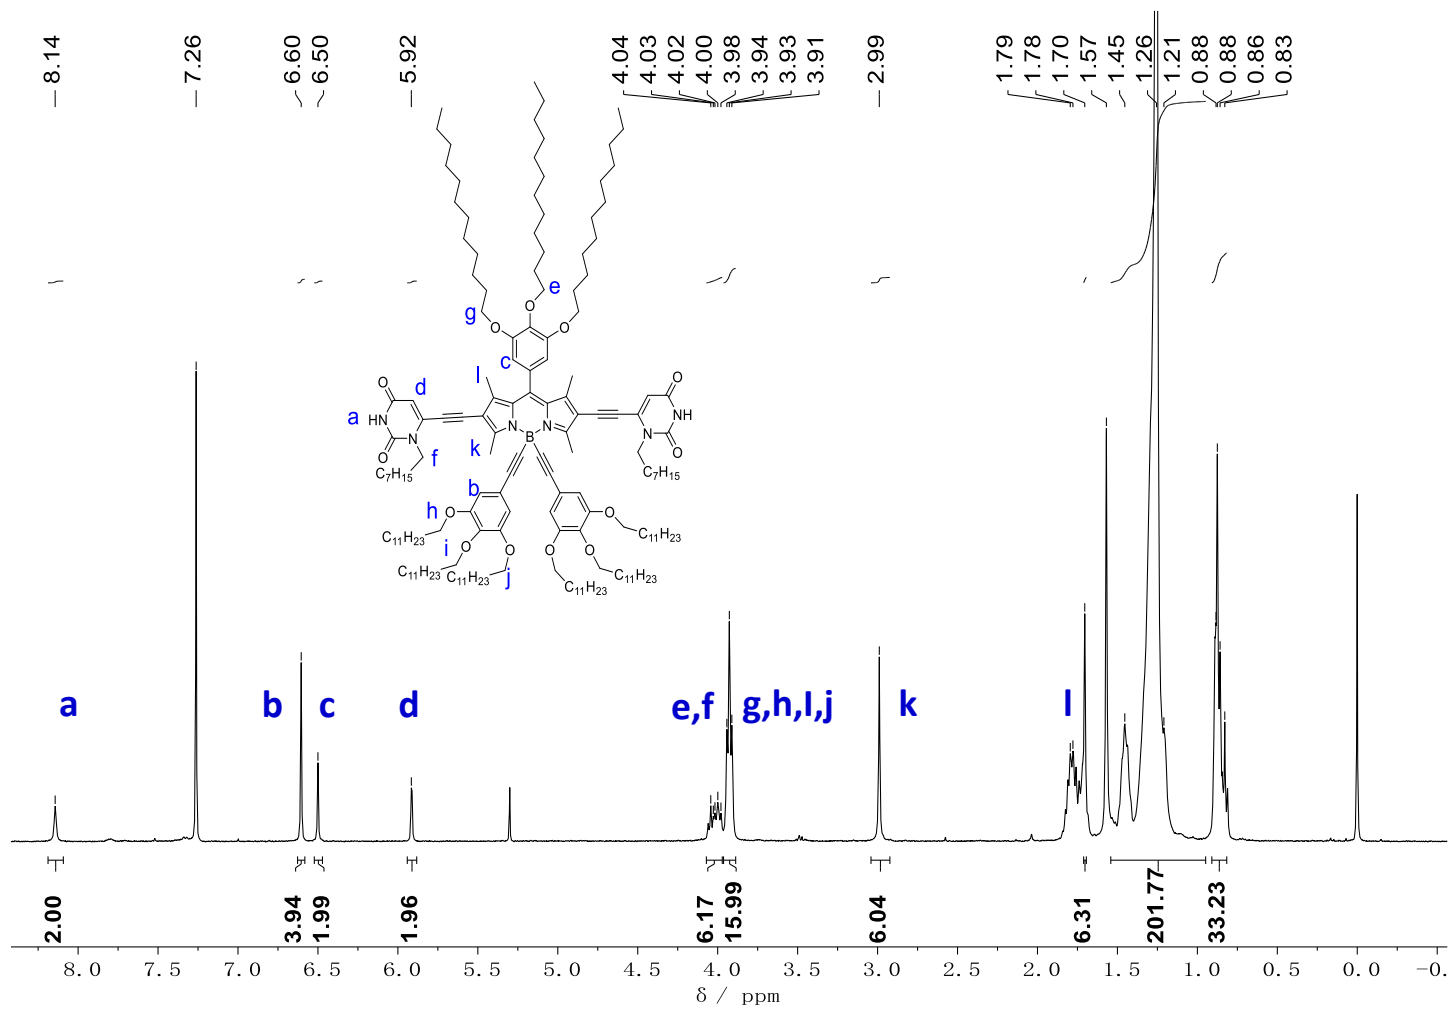

Fig. S5 The  $^1\text{H}$  NMR spectrum (400 MHz) with chemical molecular structure of compound **1b** in  $\text{CDCl}_3$  at 293 K.

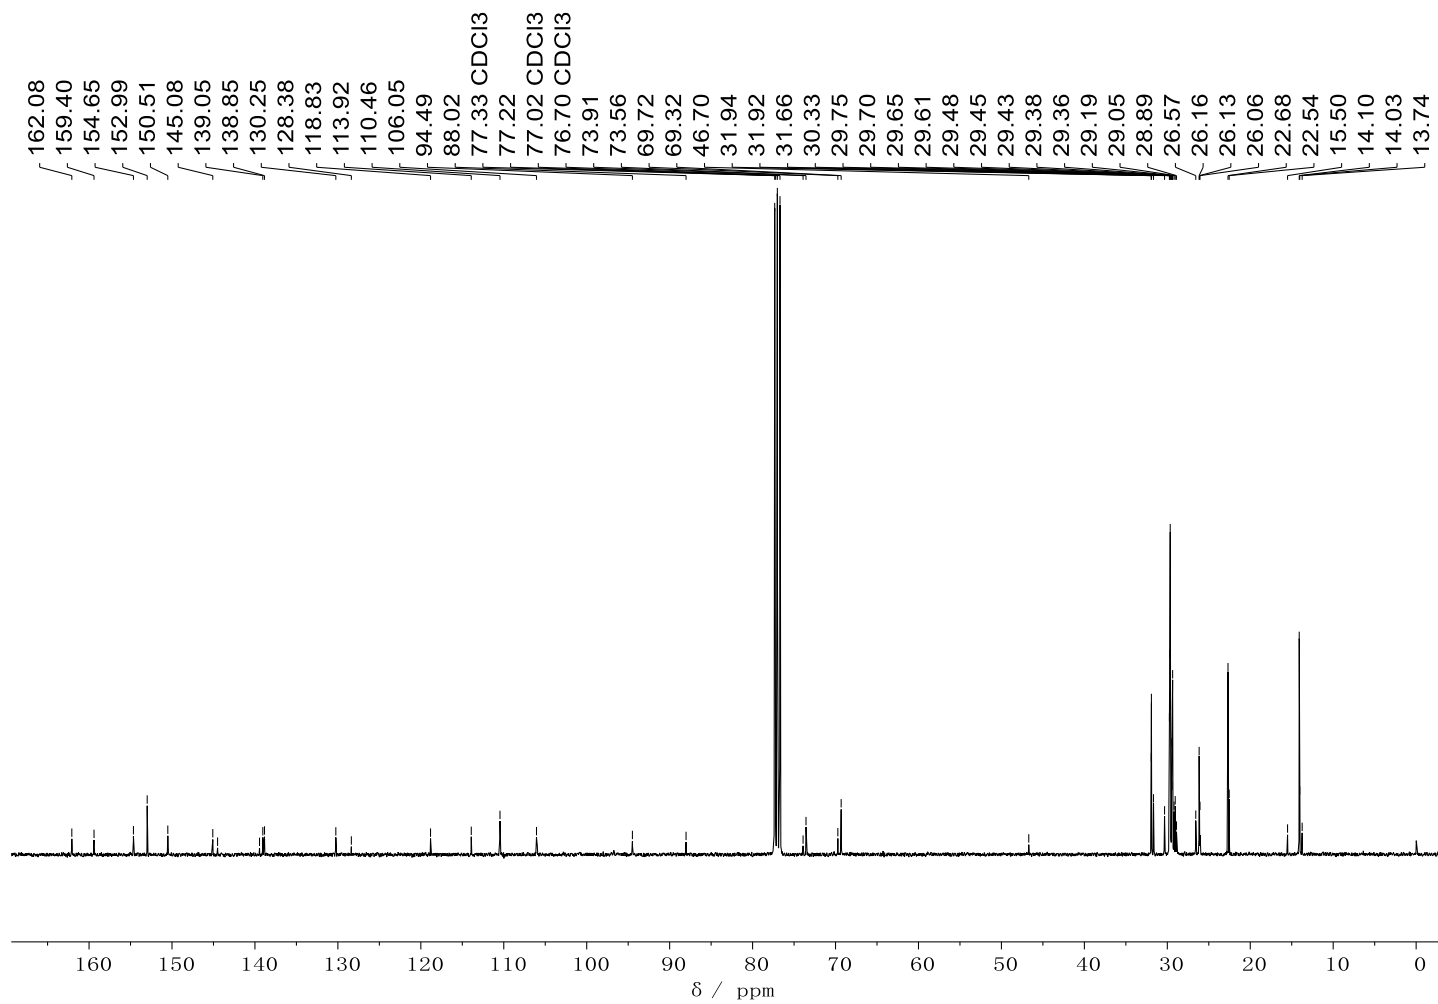

Fig. S6 The  $^{13}\text{C}$  NMR spectrum (101 MHz) with chemical molecular structure of compound **1b** in  $\text{CDCl}_3$  at 293 K.

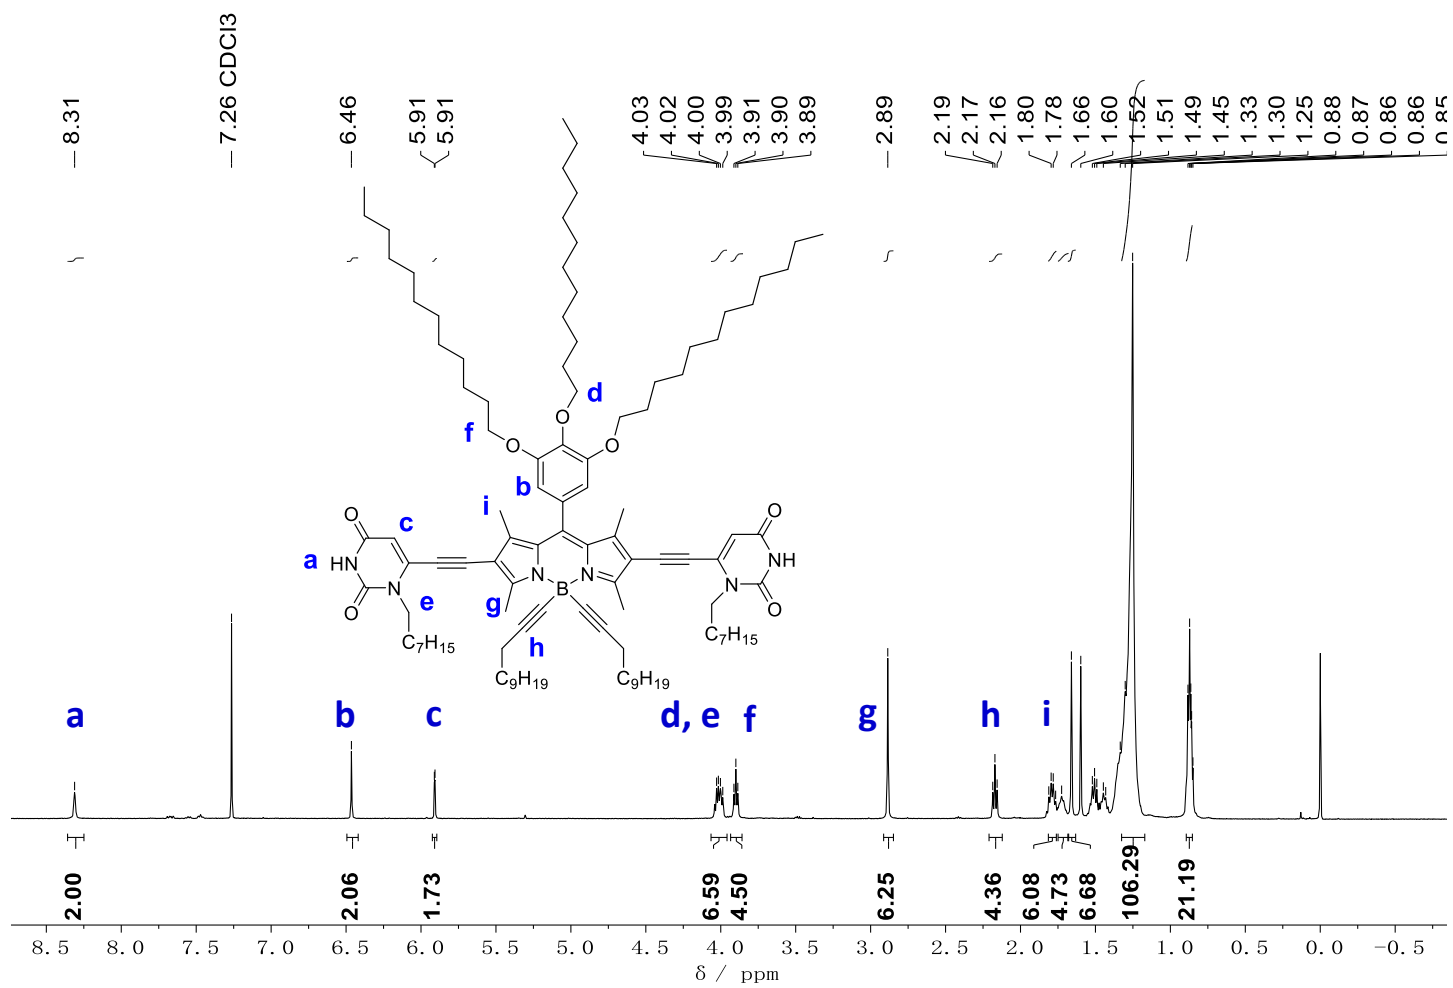

Fig. S7 The  $^1\text{H}$  NMR spectrum (400 MHz) with chemical molecular structure of compound **1c** in  $\text{CDCl}_3$  at 293 K.

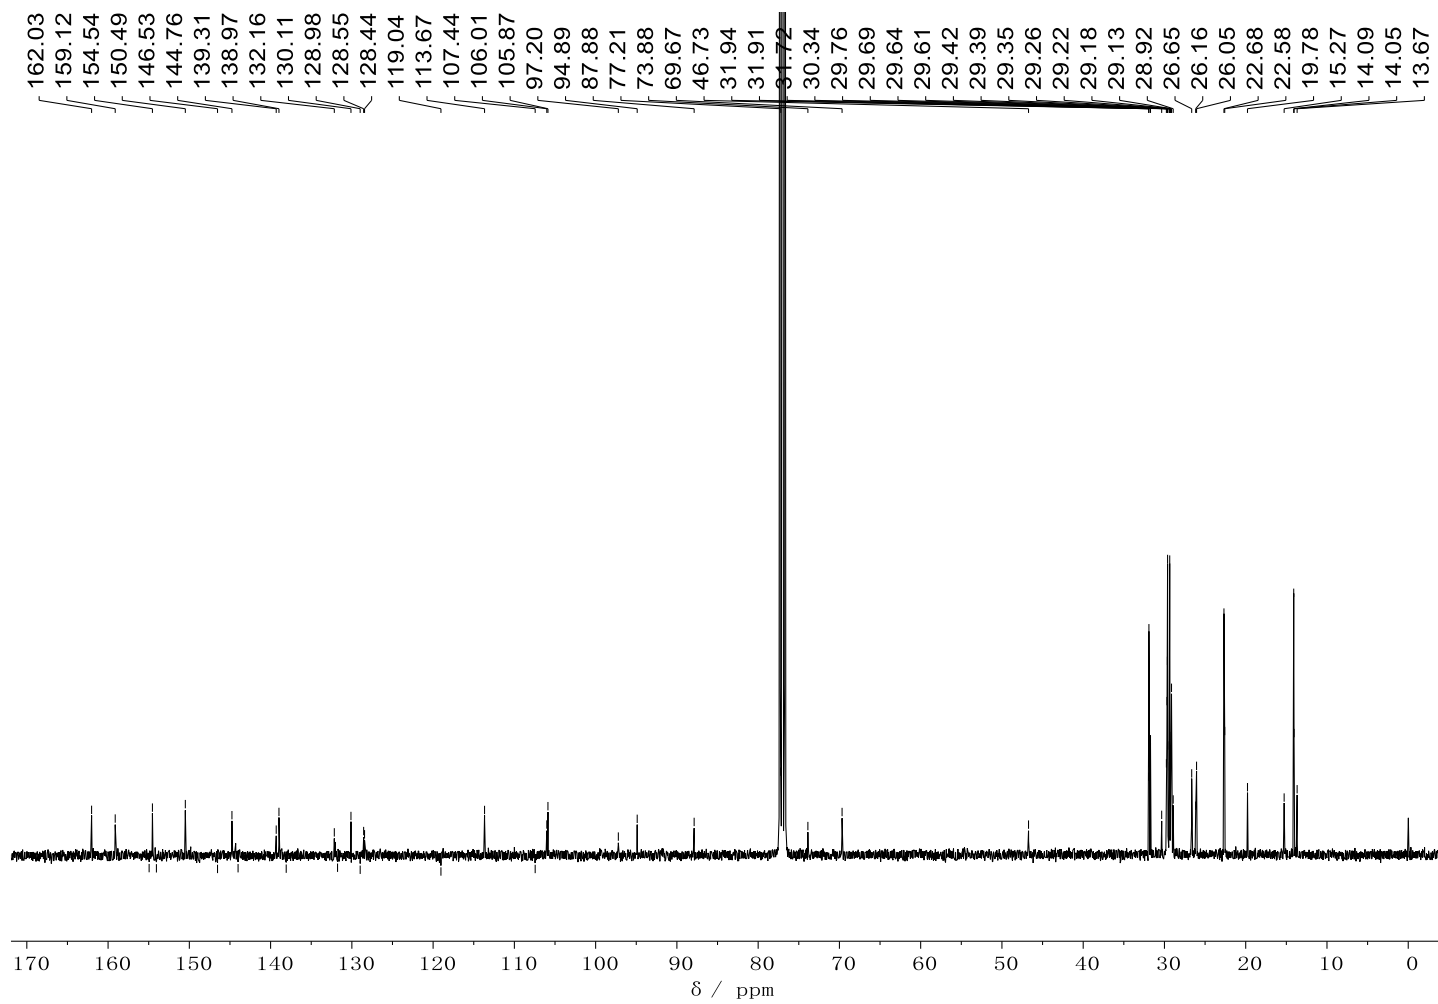

Fig. S8 The  $^{13}\text{C}$  NMR spectrum (101 MHz) with chemical molecular structure of compound **1c** in  $\text{CDCl}_3$  at 293 K.

### 3. UV/Vis absorption spectroscopic studies

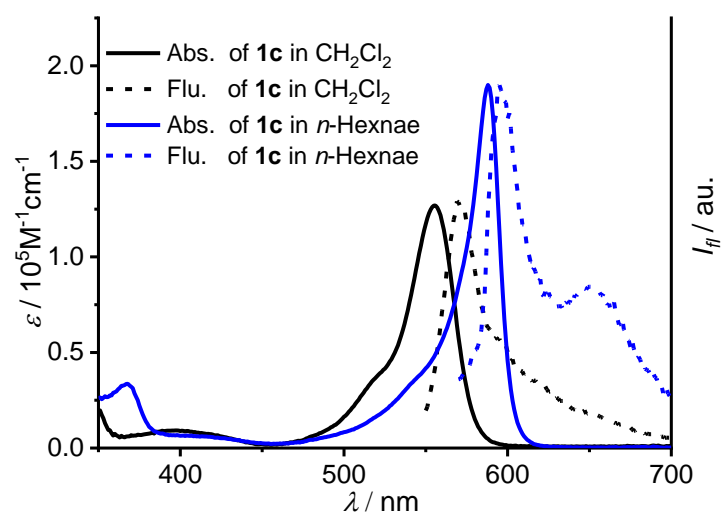

**Fig. S9** UV/Vis absorption and fluorescence spectra ( $\lambda_{\text{Ex}} = 350 \text{ nm}$ ) of dye **1c** in  $\text{CH}_2\text{Cl}_2$  ( $c_T = 1 \times 10^{-5} \text{ M}$ , black lines) and *n*-hexane ( $c_T = 1 \times 10^{-5} \text{ M}$ , blue lines).

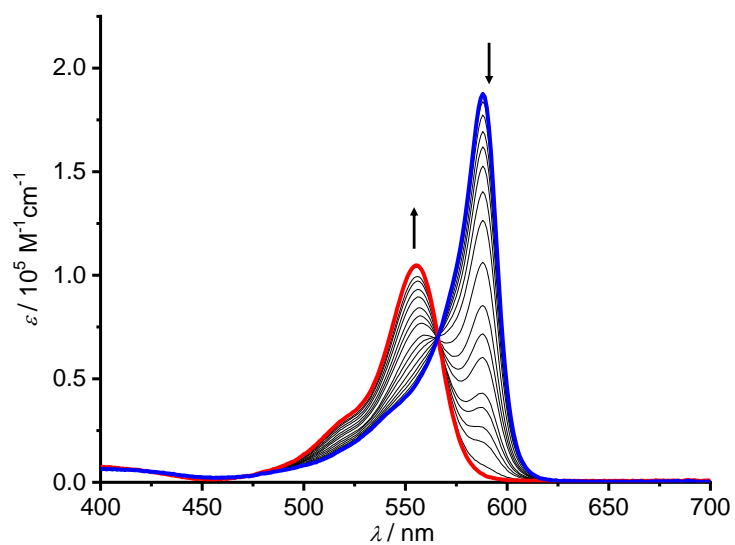

**Fig. S10.** Temperature-dependent UV/Vis absorption spectra of BODIPY dye **1c** in *n*-hexane ( $c_T = 2.0 \times 10^{-6} \text{ M}$ ). The arrows indicate the spectra changing with increasing temperature from 4 to 60°C.

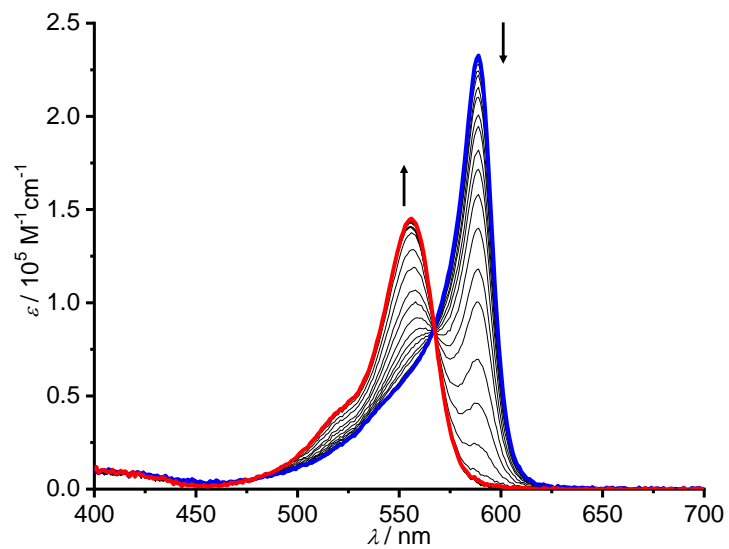

**Fig. S11.** Temperature-dependent UV/Vis absorption spectra of BODIPY dye **1b** in MCH ( $c_T = 1.0 \times 10^{-5}$  M). The arrows indicate the spectra changing with increasing temperature from 4 to 68°C.

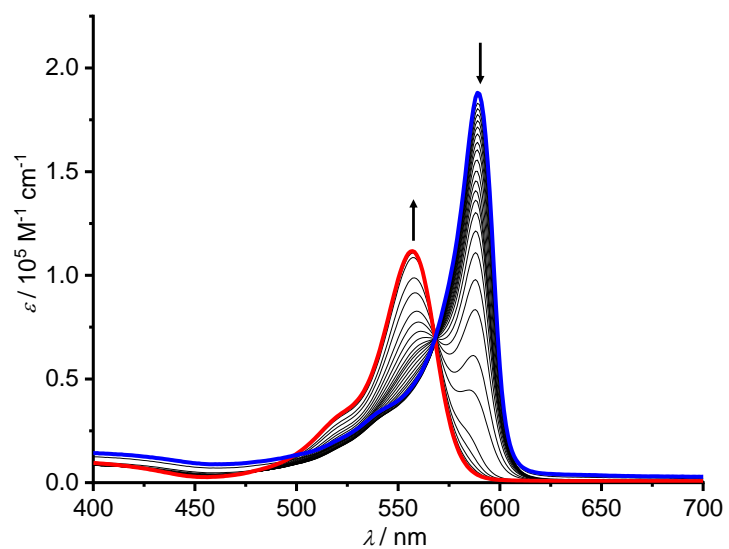

**Fig. S12.** Temperature-dependent UV/Vis absorption spectra of BODIPY dye **1c** in MCH ( $c_T = 1.0 \times 10^{-5}$  M). The arrows indicate the spectra changing with increasing temperature from 4 to 68°C.

## 5. Temperature-dependent and time-resolved fluorescence spectroscopic studies

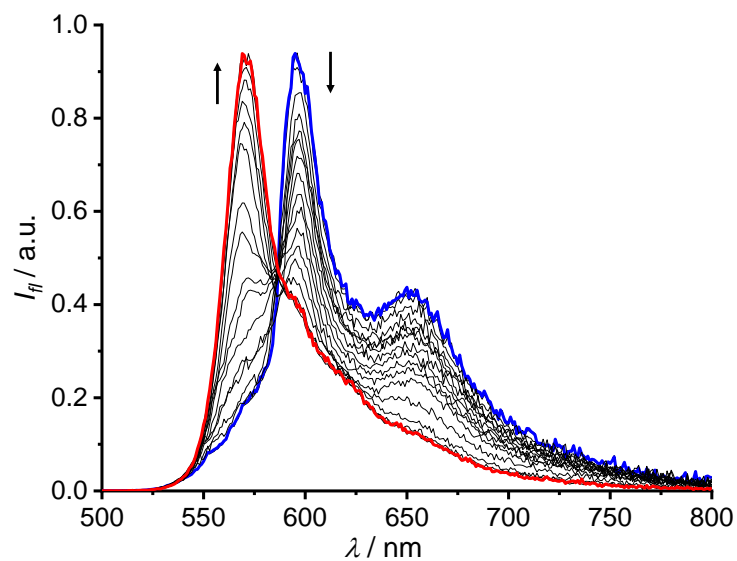

**Fig. S13** Temperature-dependent fluorescence spectra of **1c** in *n*-hexane ( $c_T = 2.0 \times 10^{-6}$  M); Arrows indicate the spectroscopic changes with increasing temperature from 4 to 60 °C.

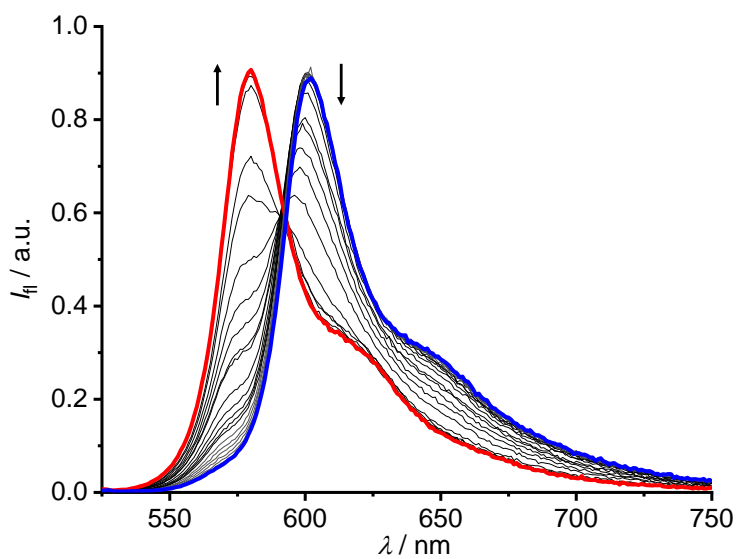

**Fig. S14** Temperature-dependent fluorescence spectra of **1b** in MCH ( $c_T = 5.0 \times 10^{-6}$  M); Arrows indicate the spectroscopic changes with increasing temperature from 4 to 70 °C.

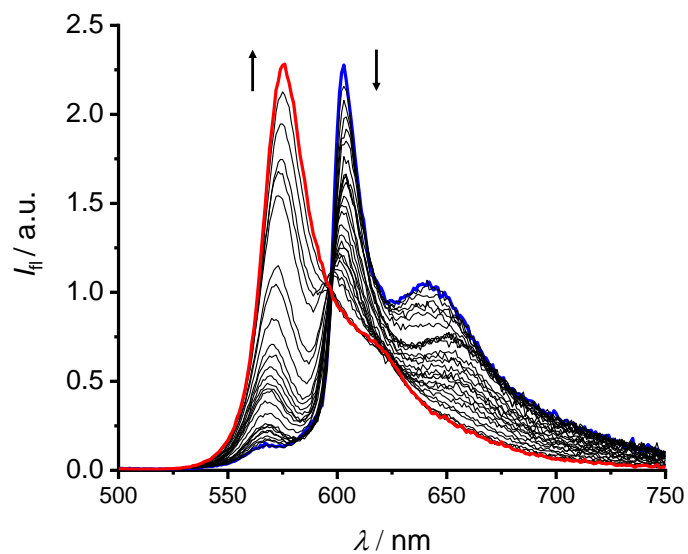

**Fig. S15** Temperature-dependent fluorescence spectra of **1c** in MCH ( $c_T = 5.0 \times 10^{-6}$  M); Arrows indicate the spectroscopic changes with increasing temperature from 4 to 70 °C.

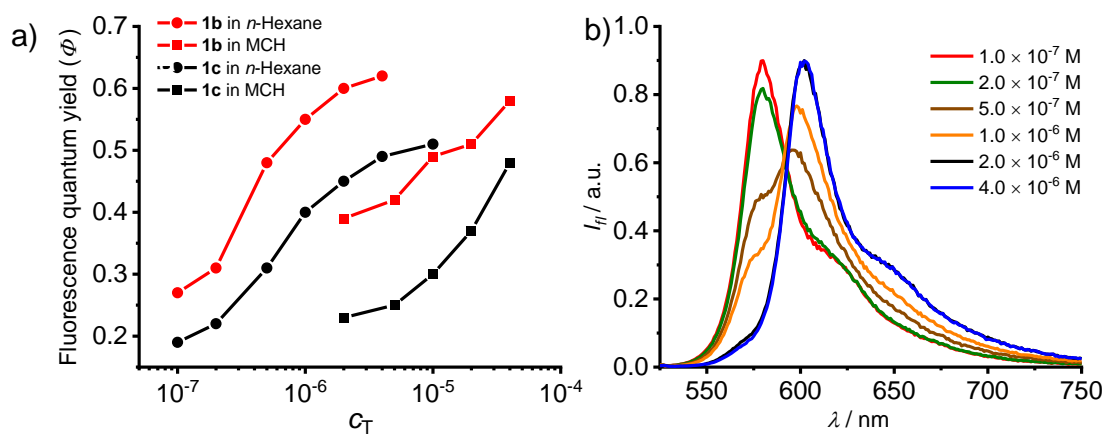

**Fig. S16** (a) Concentration-dependent fluorescence quantum yields of dyes **1b**, **c** in *n*-hexane and MCH at 293 K. (b) Concentration-dependent fluorescence spectra (normalized) of dye **1b** in *n*-hexane.



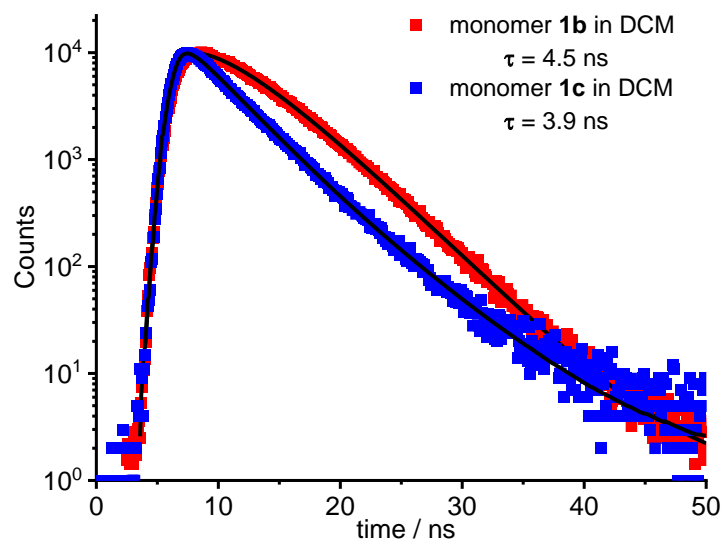

**Fig. S17** Time-resolved fluorescence decay for monomers **1b** ( $c_T = 5.0 \times 10^{-5}$  M,  $\lambda_{Ex} = 350$  nm,  $\lambda_{Em} = 578$  nm) and **1c** ( $c_T = 5.0 \times 10^{-5}$  M,  $\lambda_{Ex} = 350$  nm,  $\lambda_{Em} = 568$  nm) in  $\text{CH}_2\text{Cl}_2$ .

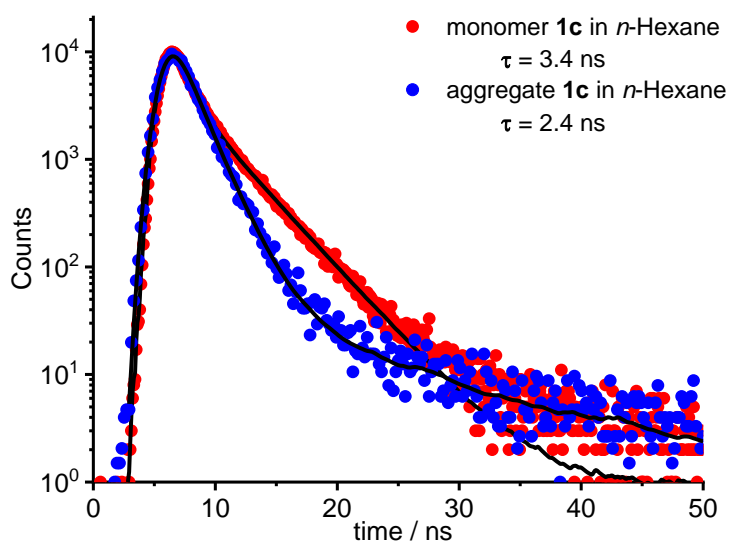

**Fig. S18** Time-resolved fluorescence decay for aggregates ( $c_T = 1.0 \times 10^{-5}$  M,  $\lambda_{Ex} = 350$  nm,  $\lambda_{Em} = 604$  nm) and monomers ( $c_T = 5.0 \times 10^{-8}$  M,  $\lambda_{Ex} = 350$  nm,  $\lambda_{Em} = 570$  nm) of **1c** in *n*-hexane.

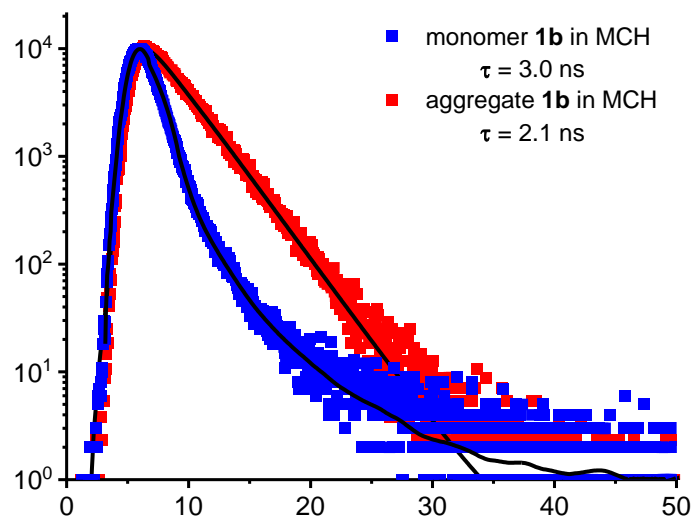

**Fig. S19** Time-resolved fluorescence decay for monomers ( $c_T = 9.0 \times 10^{-7}$  M,  $\lambda_{Ex} = 350$  nm,  $\lambda_{Em} = 578$  nm) and aggregates ( $c_T = 5.0 \times 10^{-5}$  M,  $\lambda_{Ex} = 350$  nm,  $\lambda_{Em} = 608$  nm) of **1b** in MCH.

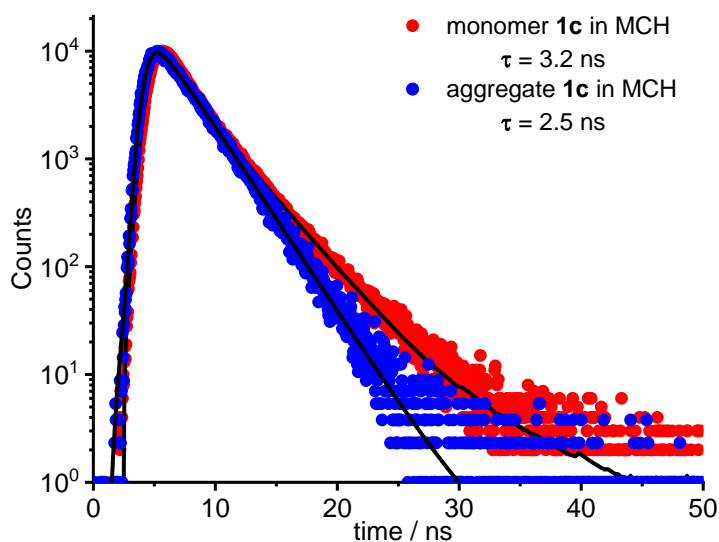

**Fig. S20** Time-resolved fluorescence decay for monomer ( $c_T = 9.0 \times 10^{-7}$  M,  $\lambda_{Ex} = 350$  nm,  $\lambda_{Em} = 570$  nm) and aggregates ( $c_T = 5.0 \times 10^{-5}$ ,  $\lambda_{Ex} = 350$  nm,  $\lambda_{Em} = 603$  nm) of **1c** in MCH.

**Table S1** Photophysical parameters of BODIPY dyes **1b**, **c** obtained from time-resolved fluorescence spectroscopy.

| Dyes      | solvent                         | $\tau_{mon}$ / ns | $\chi^2_{mon}$ | $\tau_{1agg}$ / ns (%) <sup>[a]</sup> | $\tau_{2agg}$ / ns (%) <sup>[a]</sup> | $\tau_{agg}$ / ns <sup>[b]</sup> | $\chi^2_{agg}$ |
|-----------|---------------------------------|-------------------|----------------|---------------------------------------|---------------------------------------|----------------------------------|----------------|
| <b>1b</b> | CH <sub>2</sub> Cl <sub>2</sub> | 3.9               | 1.13           | N/A                                   | N/A                                   | N/A                              | N/A            |
| <b>1c</b> | CH <sub>2</sub> Cl <sub>2</sub> | 4.5               | 1.19           | N/A                                   | N/A                                   | N/A                              | N/A            |
| <b>1b</b> | <i>n</i> -Hexane                | 3.7               | 1.15           | 0.79 (98%)                            | 4.83 (2%)                             | 0.9                              | 1.15           |
| <b>1c</b> | <i>n</i> -Hexane                | 3.4               | 0.98           | 3.35 (56.82%)                         | 1.09 (43.18%)                         | 2.4                              | 1.22           |
| <b>1b</b> | MCH                             | 3.0               | 0.96           | 0.89 (52.15%)                         | 3.51 (47.58%)                         | 2.1                              | 1.12           |
| <b>1c</b> | MCH                             | 3.2               | 1.21           | 3.45 (58.33%)                         | 1.17 (41.67%)                         | 2.5                              | 1.11           |

<sup>[a]</sup> Components of bi-exponential fluorescence lifetimes and pre-exponential factors (in brackets).

<sup>[b]</sup> Averaged fluorescence lifetimes

## 6. Studies based on cooperative supramolecular polymerization model

### Nucleation-Elongation model

The fraction of aggregated molecules  $\alpha_{agg}$  at a certain concentration and temperature can be estimated according to equation 1 based on the assumption that the dye molecules aggregate fully ( $\alpha_{agg} = 1$ ) at lowest temperature or highest concentration and exist as monomers ( $\alpha_{agg} = 0$ ) at highest temperature or lowest concentration. The  $\epsilon_{mon}$  and  $\epsilon_{agg}$  stands for molar absorption coefficients of the monomer and fully aggregated state respectively.

$$\alpha_{agg} = 1 - \frac{\epsilon - \epsilon_{agg}}{\epsilon_{mon} - \epsilon_{agg}} \quad (1)$$

For the cooperative model proposed by Meijer et al.,<sup>3</sup> the supramolecular polymerization is composed of a nucleation process at higher temperature range and an elongation process at lower temperature range. Accordingly, in the elongation regime, the fraction of aggregated species ( $\alpha_{agg}$ ) in temperature-dependent experiments can be described as equation 2:

$$\alpha_{agg} = \alpha_{SAT} \left\{ 1 - \exp \left[ \frac{-\Delta H_e}{RT_e^2} (T - T_e) \right] \right\} \quad (2)$$

Here,  $\Delta H_e$  is the enthalpy corresponding to elongation regime,  $T$  is the temperature,  $T_e$  is the critical elongation temperature,  $R$  is the ideal gas constant and  $\alpha_{SAT}$  is a parameter introduced to ensure that  $\alpha_{agg}/\alpha_{SAT}$  does not exceed unity. At the temperature above  $T_e$  (nucleation regime), the fraction of aggregated molecules can be described as equation 3, in which  $K_a$  is the dimensionless equilibrium constant of the activation.

$$\alpha_{agg} = K_a^{1/3} \exp \left[ \left( 2/3 K_a^{-1/3} - 1 \right) \frac{\Delta H_e}{RT_e^2} (T - T_e) \right] \quad (3)$$

The average length of the stack  $N_n$  at the  $T_e$  is given by equation 4.

$$\langle N_n(T_e) \rangle = \frac{1}{K_a^{1/3}} \quad (4)$$

### Goldstein-Stryer model

Concentration-dependent UV/Vis spectroscopic data were analyzed according to the Goldstein-Stryer model.<sup>4</sup> In this model, a nucleus of size  $s$  is formed in the nucleation regime through an isodesmic process with an equilibrium constant of  $K_s$  while further steps of adding more molecules to the nucleus take place with equal equilibrium constant  $K$  ( $K > K_s$ ), i.e.  $K_1 = K_2 = \dots = K_s$  and  $K_{s+1} = K_{s+2} = \dots = K$ . The cooperativity is reflected by the parameter  $\sigma$  defined as  $\sigma = K_s / K$ . The relation between dimensionless concentrations  $Kc_T$  and  $Kc_1$  can be described as the equation 5, where  $c_1$  is the concentration of the monomer species and  $c_T$  is the total concentration of the molecules:

$$Kc_T = \sum_{n=1}^s n \sigma^{n-1} (Kc_1)^n + \sum_{n=s+1}^{\infty} n \sigma^{s-1} (Kc_1)^n = \frac{s(Kc_1)^s \sigma^{s-1}}{1-Kc_1} + \frac{(Kc_1)^{s+1} \sigma^{s-1}}{(1-Kc_1)^2} + \frac{Kc_1 (s(\sigma Kc_1)^{s-1} - 1)}{\sigma Kc_1 - 1} - \frac{\sigma (Kc_1)^2 ((\sigma Kc_1)^{s-1} - 1)}{(\sigma Kc_1 - 1)^2} \quad (5)$$

In the meantime,  $\alpha_{agg}$  can be calculated from equation 6:

$$\alpha_{agg} = 1 - \alpha_{mon} = 1 - \frac{Kc_1}{Kc_T} \quad (6)$$

Both  $\alpha_{agg}$  and  $Kc_T$  can be obtained from the data of  $Kc_1$  and the curve of  $\alpha_{agg}$  against  $Kc_T$  can be drawn. The experiment data extracted from concentration-dependent UV/Vis spectra were collected and manually fitted into the curve for the best match, the results are presented in the main manuscript.

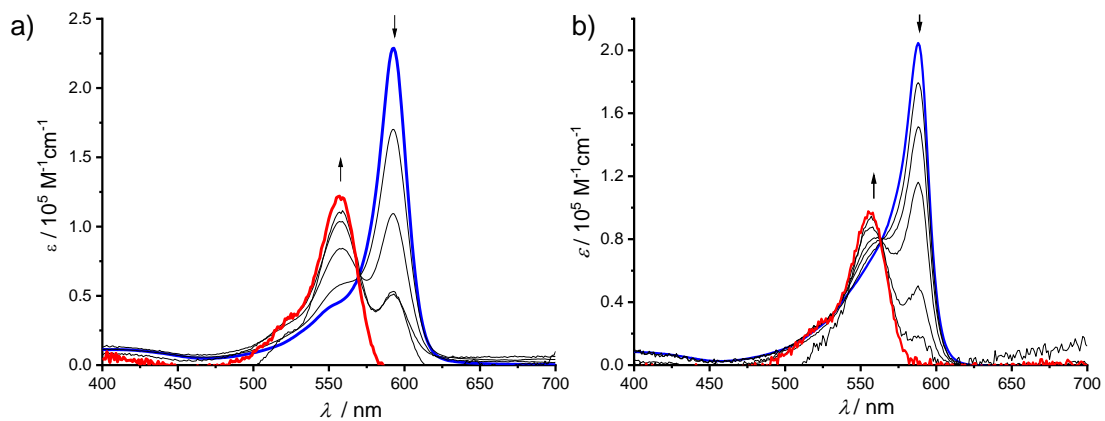

**Fig. S21.** (a) UV/Vis absorption spectra of BODIPY dye **1b** in different concentrations of *n*-hexane solution ( $2.0 \times 10^{-6}$  M to  $1.0 \times 10^{-7}$  M) at 40°C; (b) UV/Vis absorption spectra of BODIPY dye **1c** in different concentrations of *n*-hexane solution ( $1.0 \times 10^{-5}$  M to  $1.0 \times 10^{-7}$  M) at 25°C.

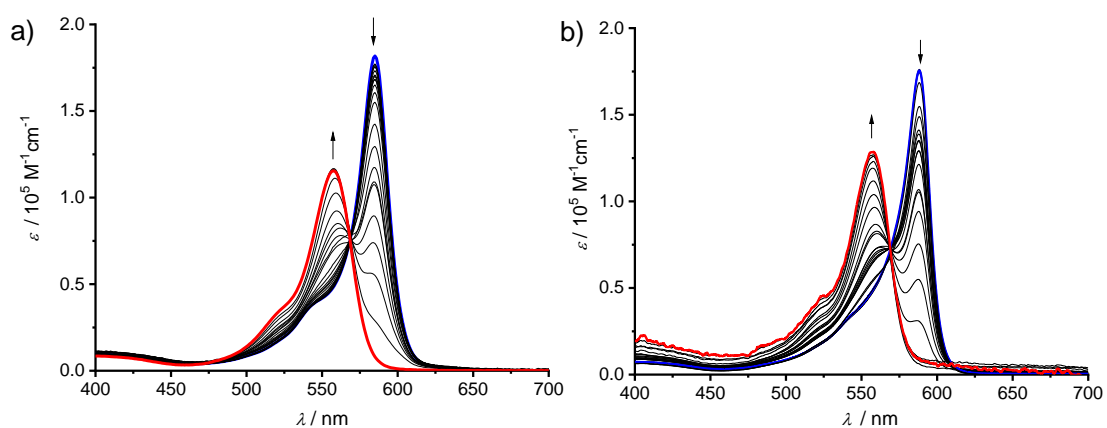

**Fig. S22.** (a) UV/Vis absorption spectra of BODIPY dye **1b** in different concentrations of MCH solution ( $8.0 \times 10^{-5}$  M to  $9.0 \times 10^{-7}$  M) at 25°C; (b) UV/Vis absorption spectra of BODIPY dye **1c** in different concentrations of MCH solution ( $8.0 \times 10^{-5}$  M to  $1.0 \times 10^{-5}$  M) at 25°C.

## 7. Concentration-dependent <sup>1</sup>H NMR spectroscopic studies

The concentration-dependent <sup>1</sup>H NMR data was fitted using the model developed by LaPlanche et al.<sup>5</sup> to derive the association constants for hydrogen bonding. The model describes the hydrogen bonding-directed assembly via an initial dimerization (Eq. 7) and higher order aggregation (Eq. 8).

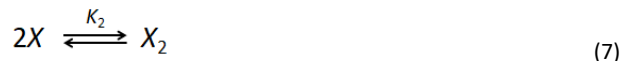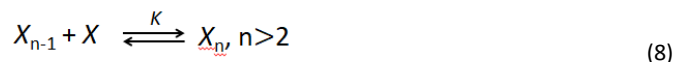

In the above expressions, X represents monomer and X<sub>n</sub> represents the aggregated species composed of n monomers. In brief, the assumptions for simplifying the model are (1) the monomer-dimer equilibrium has a unique binding constant K<sub>2</sub>; (2) the association constants K for higher order aggregation events are all equal; (3) the chemical shift of a proton in assembly X<sub>n</sub> does not depend on n when n ≥ 2; (4) the amount of hydrogen bonding between dye molecules and the solvent is negligible.

From the equations derived by LaPlanche, the chemical shift δ<sub>calcd</sub> for a given proton in the above system satisfies

$$\delta_{calcd} = (\delta_1 - \delta_n)\alpha + \delta_n \quad (9)$$

$$\alpha = \frac{\left[ \frac{\sigma^{n-1}(K[X])^n}{1-K[X]} + K[X] \right]}{\left[ \frac{\sigma^{n-1}(K[X])^n}{1-K[X]} + \frac{n+1-K[X]}{(1-K[X])^2} \right]} \quad (10)$$

δ<sub>1</sub> is the chemical shift of the proton in the monomer.

δ<sub>n</sub> is the chemical shift in aggregate species.

σ is cooperativity factor defined as K<sub>2</sub> / K.

[X] is the molar concentration of non-hydrogen bonded monomers, which can be solved from equation 11:

$$\begin{aligned} Kc_T &= K[X] + \sum_{n=2}^{\infty} n \cdot K[X_n] \\ &= K[X] + \sigma(K[X])^2 \frac{2-K[X]}{(1-K[X])^2} \\ &= K[X] + \frac{2\sigma(K[X])^2 - \sigma(K[X])^3}{(1-K[X])^2} \end{aligned} \quad (11)$$

where [X<sub>n</sub>] is defined as the concentration of the aggregate species. As equation 14 has only one real root subject to the physical constraints of the experiment, a [X] value for a given pair of K<sub>2</sub> and K can be determined explicitly for any experimental concentration.

Subsequently, the δ<sub>calcd</sub> can be plotted as a function of Kc<sub>T</sub> by substituting equation 10 and 11 into equation 9. Then the calculated δ<sub>calcd</sub> - Kc<sub>T</sub> curve can be manually fitted with the plot of δ<sub>obsd</sub> versus Kc<sub>T</sub> to find the best overall agreement between calculated curve and experimental data. Then values of K<sub>2</sub> and K can be determined.

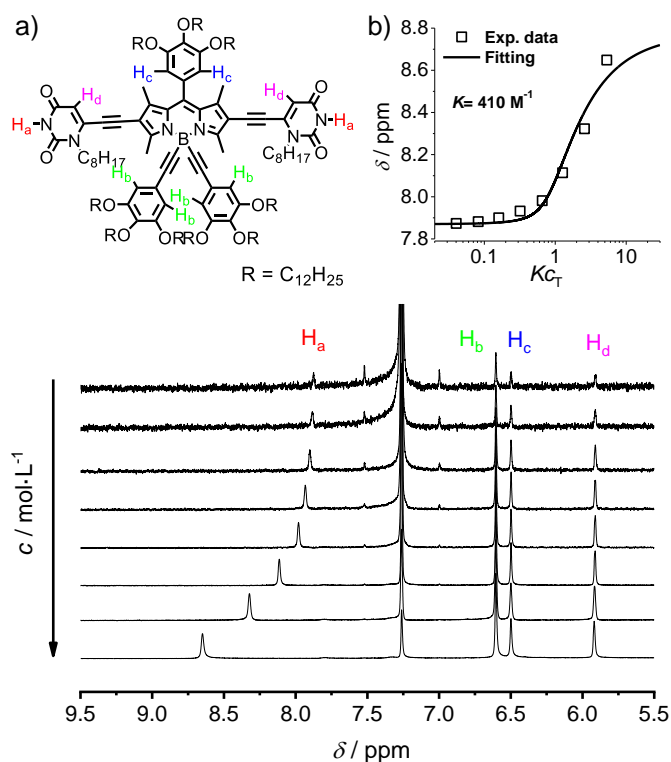

**Fig. S23** Concentration-dependent  $^1\text{H}$  NMR spectra of dye **1b** ( $\text{CDCl}_3$ , 400 MHz, 298 K). The arrow indicates the spectroscopic changes with increasing concentration from  $9.8 \times 10^{-5}$  M to  $1.3 \times 10^{-2}$  M. Inset: The structure of dye **1b** and plot of chemical shift of  $\text{H}_a$  in dye **1b** versus dimensionless concentration  $Kc_T$  and the fitting curve calculated with LaPlanche model.

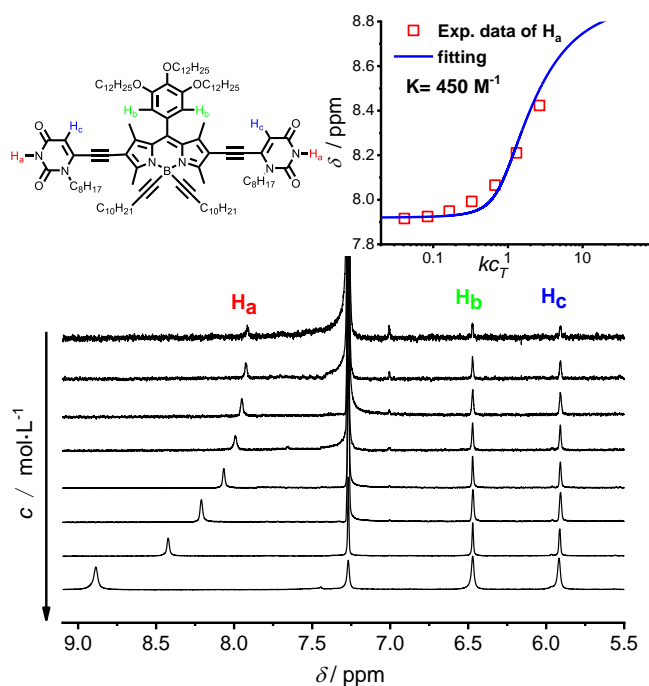

**Fig. S24** Concentration-dependent  $^1\text{H}$  NMR spectra of dye **1c** ( $\text{CDCl}_3$ , 400 MHz, 298 K). The arrow indicates the spectroscopic changes with increasing concentration from  $9.8 \times 10^{-5}$  M to  $1.3 \times 10^{-2}$  M. Inset: The structure of dye **1c** and plot of chemical shift of  $\text{H}_a$  in dye **1c** versus dimensionless concentration  $Kc_T$  and the fitting curve calculated with LaPlanche model.

## 8. Studies based on molecular exciton theory

The theoretical absorption spectral shift arising from the "brickwork" arrangement of BODIPY chromophores can be estimated by Kasha's molecular exciton model,<sup>6</sup> which is based on the point-dipole approximation and the assumption of additive increments for each pairwise interaction between dye neighbors in extended aggregates. The spectral shift is determined by the distance between two interacting dye neighbors as well as the angle between the aggregation direction and the connecting line of two point dipoles. At short distances and small angles (< 54.7 °) between the molecules, the UV/Vis absorption spectrum could be significantly red-shifted.

The equation 12 can be used to calculate the splitting of excited state energy levels caused by exciton coupling between aggregated molecules.

$$\varepsilon = \frac{|\mu_{eg}|^2}{4\pi\varepsilon_0 r_{uv}^3} (1 - 3\cos^2\theta) \quad (12)$$

where  $\mu_{eg}$  is the transition dipole moment of the monomer,  $\varepsilon_0$  the permittivity of vacuum,  $r_{uv}$  the distance between centers of adjacent molecules  $u$  and  $v$ , and  $\theta$  is the slip angle that results from the translational offset of these two parallel-arranged molecules. The transition dipole moment of the monomer can be obtained by equation 13.

$$|\mu_{eg}|^2 = \frac{3hc\varepsilon_0 \ln 10}{2\pi^2 N_A} \cdot \int_{\tilde{\nu}_1}^{\tilde{\nu}_2} \frac{\varepsilon(\tilde{\nu})}{\tilde{\nu}} d\tilde{\nu} \quad (13)$$

in which  $\varepsilon(\tilde{\nu})$  is the molar extinction coefficient,  $c$  the speed of light ( $2.9979 \times 10^{10}$  cm s<sup>-1</sup>),  $h$  the Planck's constant ( $6.6262 \times 10^{-34}$  Js),  $\varepsilon_0$  the permittivity of vacuum ( $8.8542 \times 10^{-12}$  C<sup>2</sup>J<sup>-1</sup>m<sup>-1</sup>).

The calculated results of transition dipole moments for dyes **1a-c** are listed in paper. Substituting the transition dipole moment into equation 12 yields the value for the exciton splitting. Then equation 14 is used to calculate the spectral shift caused by exciton coupling between neighboring molecules

$$\Delta\tilde{\nu} = \frac{\varepsilon}{hc} \quad (14)$$

Assuming that the exciton coupling occurs between adjacent molecules in the direction of hydrogen bond and in the direction of  $\pi$ - $\pi$  stacking, the experimental and theoretical values of spectral wavenumber movement should satisfy the following relation.

$$\Delta\tilde{\nu}_{ex} < 2\frac{\varepsilon_H}{hc} + 2\frac{\varepsilon_\pi}{hc} + 2\frac{\varepsilon_{\pi'}}{hc} \quad (15)$$

The employed geometrical parameters for calculation were obtained from the molecular modeling of the tetramers (Fig. 5 and Fig. S25). The parameters are illustrated in Fig. 5b, which include the distances between chromophore centers in hydrogen bonding direction ( $r_H$ ) and  $\pi$ - $\pi$  stacking direction ( $r_\pi$ ,  $r_{\pi'}$ ), the offset angles caused by the slipped arrangement between two hydrogen bonded molecules ( $\vartheta_H$ ) and two  $\pi$ - $\pi$  stacked molecules ( $\vartheta_\pi$ ,  $\vartheta_{\pi'}$ ) relative to the aggregation direction. As a result, the calculated spectral shifts for the J-aggregates of dyes **1a**, **b**, **c** are  $\Delta\tilde{\nu} < -1371$  cm<sup>-1</sup>,  $\Delta\tilde{\nu} < -895$  cm<sup>-1</sup>,  $\Delta\tilde{\nu} < -957$  cm<sup>-1</sup> respectively, which are in agreement with the experimental values (Table 3).

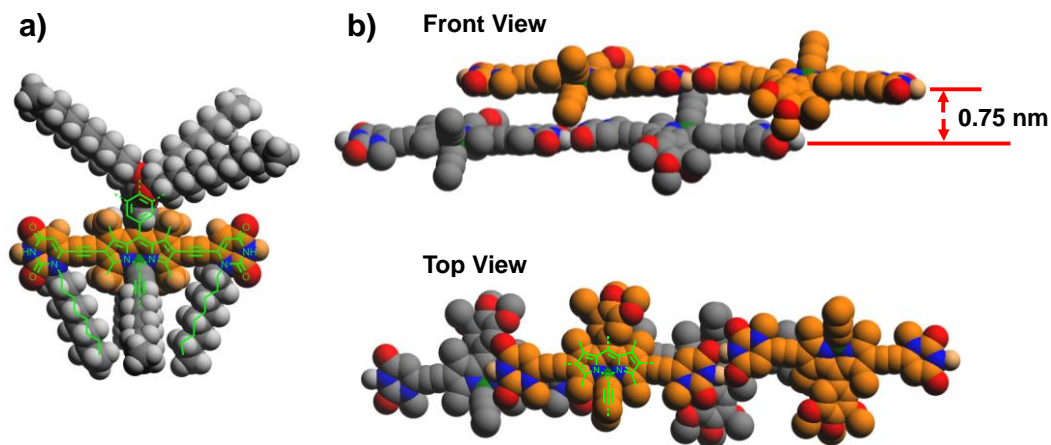

**Fig. S25** (a) CPK model of BODIPY dye **1c** with geometry optimized on PM6 level in MOPAC program; (b) Geometrically optimized tetrameric aggregate of **1c** with PM6-D3H4 method (Alkyls and hydrogen atoms not involved in H-bonding are omitted for clarity in the figure).

## 9. References

1. G. Fan, Y. Lin, L. Yang, F. Gao, Y. Zhao, Z. Qiao, Q. Zhao, Y. Fan, Z. Chen and H. Wang, Co-self-assembled nanoaggregates of BODIPY amphiphiles for dual colour imaging of live cells, *Chem. Commun.*, 2015, **51**, 12447.
2. T. Moriuchi, S. Noguchi, Y. Sakamoto and T. Hirao, Synthesis and characterization of bioorganometallic conjugates composed of NCN-pincer platinum(II) complexes and uracil derivatives, *J. Organomet. Chem.*, 2011, **696**, 1089.
3. (a) P. Jonkheijm, P. van der Schoot, A. Schenning and E. W. Meijer, Probing the solvent-assisted nucleation pathway in chemical self-assembly, *Science*, 2006, **313**, 80; (b) M. M. J. Smulders, A. P. H. J. Schenning and E. W. Meijer, Insight into the mechanisms of cooperative self-assembly: The "sergeants-and-soldiers" principle of chiral and achiral C-3-symmetrical discotic triamides, *J. Am. Chem. Soc.*, 2008, **130**, 606.
4. (a) R. F. Goldstein and L. Stryer, Cooperative polymerization reactions. Analytical approximations, numerical examples, and experimental strategy, *Biophys. J.*, 1986, **50**, 583. (b) G. Fernández, M. Stolte, V. Stepanenko, and F. Würthner, Cooperative Supramolecular Polymerization: Comparison of Different Models Applied on the Self-Assembly of Bis(merocyanine) Dyes, *Chem. Eur. J.* 2013, **19**, 206-217.
5. (a) L. A. LaPlanche, H. B. Thompson and M. T. Rogers, Chain Association Equilibria. A Nuclear Magnetic Resonance Study of the Hydrogen Bonding of N-Monosubstituted Amides, *J. Phys. Chem.*, 1964, **69**, 1482; (b) W. S. Horne, C. D. Stout and M. R. Ghadiri, A heterocyclic peptide nanotube, *J. Am. Chem. Soc.*, 2003, **125**, 9372.
6. T. E. Kaiser, V. Stepanenko and F. Würthner, Fluorescent J-Aggregates of Core-Substituted Perylene Bisimides: Studies on Structure-Property Relationship, Nucleation-Elongation Mechanism, and Sergeants-and-Soldiers Principle, *J. Am. Chem. Soc.*, 2009, **131**, 6719.
